# Supplementary material for: Comparison between Imaging and Physiology in Guiding Coronary Revascularization: A Meta-Analysis
Source: MDPI journal article supplement (doi:10.3390/jcm13092504), 2024-04-24
Supplement: s1 [file s1]

## Supplementary Material

- **TableS1: Inclusion and exclusion criteria of single studies.**
- **TableS2: Imaging and physiology criteria for Intermediate Coronary Artery Lesions (ICLs) revascularization**
- **FigureS1: Bias Qualitative Assessment**
- **FigureS2: Publication Bias Assessment for MACE**
- **FigureS3: Publication Bias Assessment for TVR**
- **FigureS4: Publication Bias Assessment for TVF**
- **FigureS5: Publication Bias Assessment for TLR**
- **FigureS6: Bubble plots from Meta-Regression analysis**

| Study           | Inclusion criteria                                                                                                                                                                                                                                                                                                                                                              | Exclusion criteria                                                                                                                                                                                                                                                                                                                                                                                                                                                                                                                                                                                                                                                                                                                                                                                                                                                                   |
|-----------------|---------------------------------------------------------------------------------------------------------------------------------------------------------------------------------------------------------------------------------------------------------------------------------------------------------------------------------------------------------------------------------|--------------------------------------------------------------------------------------------------------------------------------------------------------------------------------------------------------------------------------------------------------------------------------------------------------------------------------------------------------------------------------------------------------------------------------------------------------------------------------------------------------------------------------------------------------------------------------------------------------------------------------------------------------------------------------------------------------------------------------------------------------------------------------------------------------------------------------------------------------------------------------------|
| Burzotta et al. | <ul style="list-style-type: none"> <li>- ICL defined as 40% to 80% stenosis by visual assessment in a non-distal segment of a major epicardial coronary artery.</li> <li>- Single vessel disease</li> <li>- Multivessel disease including only ICLs.</li> <li>- Multivessel disease including at least one ICL and previously treated angiographic critical stenosis</li> </ul> | <ul style="list-style-type: none"> <li>- Age≤18 years</li> <li>- Impossibility to give informed consent</li> <li>- Female sex with child-bearing potential</li> <li>- Life expectancy≤12 months</li> <li>- Factors making clinical follow-up difficult</li> <li>- LVEF&lt;30%</li> <li>- Recent (&lt;7 days) STEMI</li> <li>- Recent (&lt;48 hours) NSTEMI</li> <li>- Prior STEMI in the territory supplied by the vessel under investigation</li> <li>- Severe myocardial hypertrophy</li> <li>- Severe valvular heart disease</li> <li>- Significant platelet count alteration (&lt;100.000 cells/mm<sup>3</sup> or &gt;700.000 cells/mm<sup>3</sup>)</li> <li>- Gastrointestinal bleeding requiring surgery or blood transfusions within 4 previous weeks</li> <li>- History of clotting pathology</li> <li>- Known hypersensitivity to aspirin, heparin, contrast dye</li> </ul> |

|                    |                                                                                                                                                       |                                                                                                                                                                                                                                                                                                                                                                      |
|--------------------|-------------------------------------------------------------------------------------------------------------------------------------------------------|----------------------------------------------------------------------------------------------------------------------------------------------------------------------------------------------------------------------------------------------------------------------------------------------------------------------------------------------------------------------|
|                    |                                                                                                                                                       | <ul style="list-style-type: none"> <li>- Advance CKD with GFR&lt;30 ml/min</li> </ul>                                                                                                                                                                                                                                                                                |
| Nam et al.         | ICL defined as 40% to 70% stenosis by visual assessment in a proximal or mid part of a major epicardial coronary artery (no ischemia test needed)     | <ul style="list-style-type: none"> <li>• Primary or emergency setting PCI for ACS.</li> <li>• Prior CABG.</li> <li>• Multiple lesions on the same vessel.</li> <li>• Left main disease, primary myocardial disease or any major life threatening illness.</li> <li>• Contraindications to adenosine, ASA and clopidogrel.</li> </ul>                                 |
| D'Ascenzo et al.   | Patients treated for ACS using OCT (from January 2014 to October 2015) or FFR (from January 2009 to December 2012) on culprit or non-culprit lesions. | <ul style="list-style-type: none"> <li>- Patients with poor image quality, incomplete pull-back or missing data.</li> <li>- Absence of signed informed consent</li> <li>- Patients who did not implant II generation drug eluting stent,</li> <li>- Age&lt;18 years old, pregnancy or shock, incomplete clinical data or loss at follow-up</li> </ul>                |
| De La Torre et al. | De novo ICL                                                                                                                                           | LMA lesions                                                                                                                                                                                                                                                                                                                                                          |
| Koo et al.         | De novo ICL (40 to 70%) in a target vessel with visual estimation diameter≥2,5mm.                                                                     | <ul style="list-style-type: none"> <li>- Life expectancy &lt; 2 years.</li> <li>- Target lesion in LMA or previous CABG.</li> <li>- Increased bleeding risk</li> </ul>                                                                                                                                                                                               |
| Soh et al.         | NA                                                                                                                                                    | NA                                                                                                                                                                                                                                                                                                                                                                   |
| Budrys et al.      | Hemodynamically significant (FFR <0.8) long lesions necessitating > 30 mm of stent in patients with NSTEMI or Stable coronary artery disease          |                                                                                                                                                                                                                                                                                                                                                                      |
| Choi et al.        | Successful PCI and High clinical/lesion/procedure related factor                                                                                      | <ul style="list-style-type: none"> <li>-Cardiogenic shock at the index admission</li> <li>-Subject treated with only BMS or plain old balloon angioplasty during the index procedure.</li> <li>- Patients who are actively participating in another drug or device investigational study, which have not completed the primary endpoint follow-up period.</li> </ul> |

**Table S1. Inclusion and exclusion criteria of single studies.** NA, Not Available; FFR, Flow Fractional Reserve; PCI, Percutaneous coronary Intervention; CABG, Coronary Artery Bypass Grafting; ACS, Acute coronary Syndrome; LAD, Left Anteriore

Descending;LMA, Left Main Artery; IVUS, Intra-Vascular Ultra-Sonography, OCT, Optical Coherence Tomography; CKD, Chronic Kidney Disease; GFR, Glomerular Filtration Rate.

| Study              | FFR             | Imaging                                                                                                                                                                                                                                        |
|--------------------|-----------------|------------------------------------------------------------------------------------------------------------------------------------------------------------------------------------------------------------------------------------------------|
| Burzotta et al.    | FFR $\leq$ 0,80 | <ul style="list-style-type: none"> <li>- Area Stenosis &gt;75%.</li> <li>- Area Stenosis between 50% and 75% with MLA&lt;2,5mm<sup>2</sup> or plaque rupture.</li> </ul>                                                                       |
| Nam et al.         | FFR<0,8         | MLA<4mm <sup>2</sup>                                                                                                                                                                                                                           |
| De La Torre et al. | FFR<0,75        | Lesions with plaque burden>50% and: <ul style="list-style-type: none"> <li>- MLA&lt;4mm<sup>2</sup> in vessels with reference diameter &gt;3mm.</li> <li>- MLA&lt;3,5mm<sup>2</sup> in vessels with diameter between 2,5mm and 3mm.</li> </ul> |
| Koo et al.         | FFR<0,8         | <ul style="list-style-type: none"> <li>- MLA&lt;3mm<sup>2</sup></li> <li>- MLA 3-4mm<sup>2</sup> with plaque burden&gt;70%</li> </ul>                                                                                                          |

**Table S2. Imaging and physiology criteria for Intermediate Coronary Artery Lesions (ICLs) revascularization.** FFR, Flow Fractional Reserve;MLA, Minimal Lumen Area.

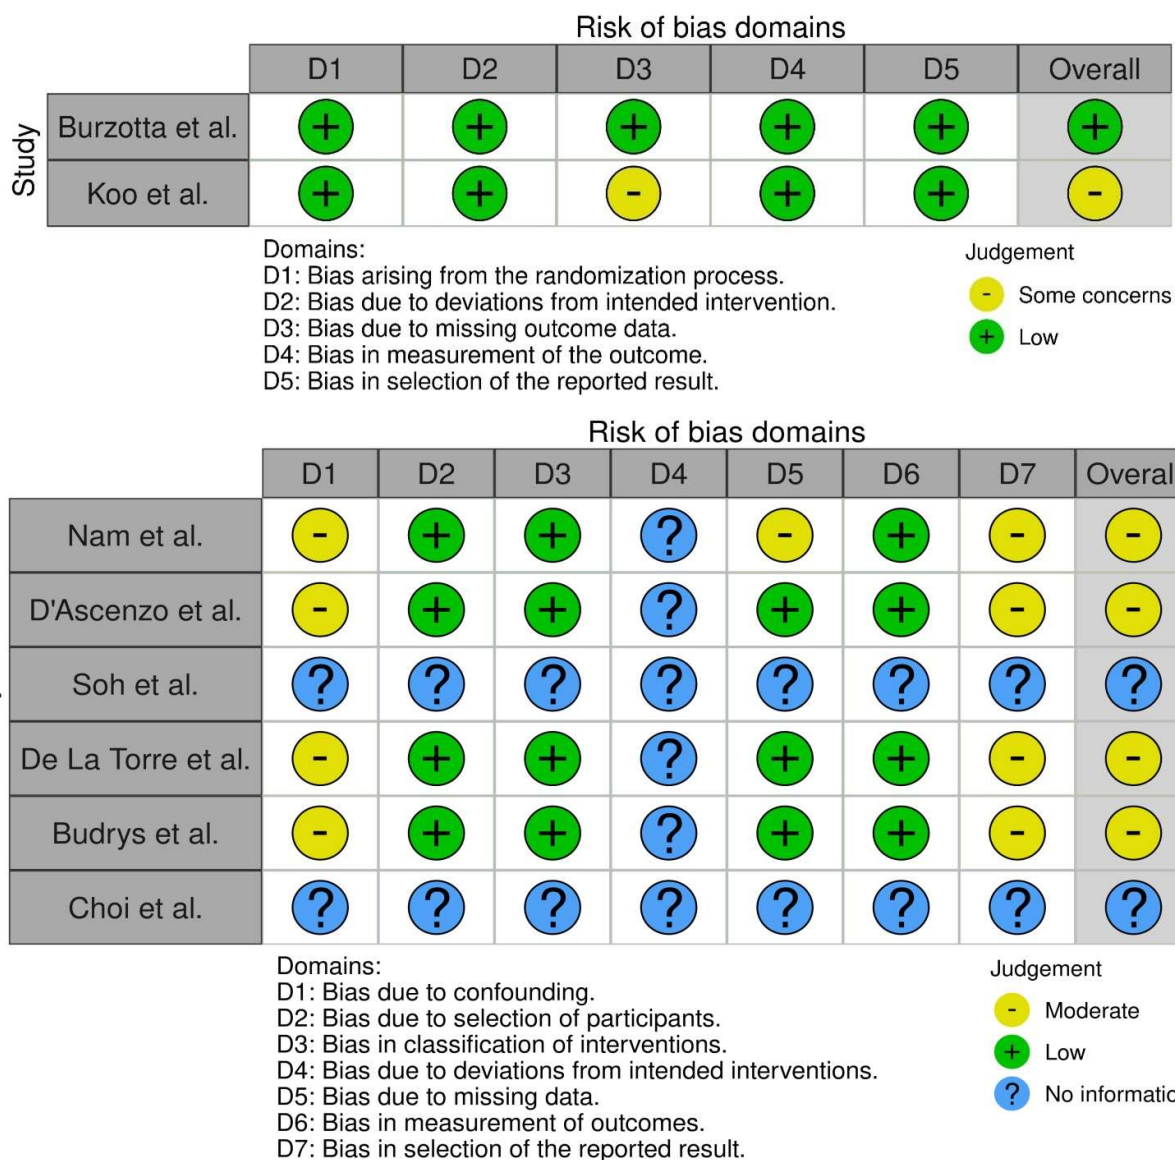

**Figure S1. Bias Qualitative Assessment.** In the upper part analysis for randomized controlled trials; in the lower part analysis for observational studies.

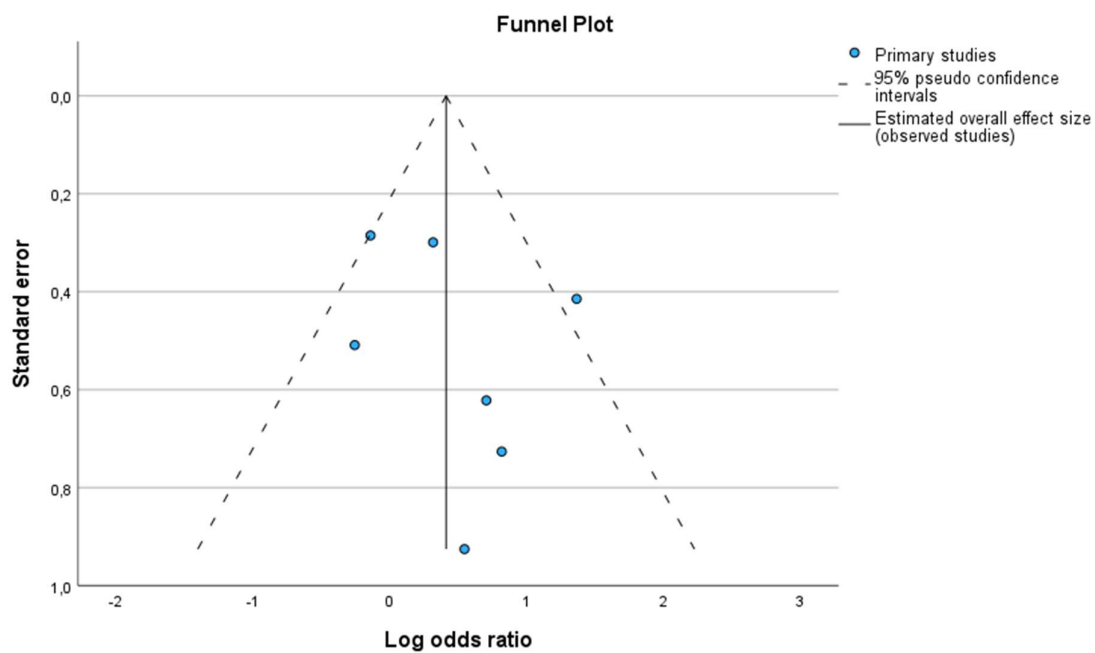

**Egger's Regression-Based Test<sup>a</sup>**

| Parameter       | Coefficient | Std. Error | t      | Sig. (2-tailed) | 95% Confidence Interval |       |
|-----------------|-------------|------------|--------|-----------------|-------------------------|-------|
|                 |             |            |        |                 | Lower                   | Upper |
| (Intercept)     | -.576       | .5433      | -1.061 | .349            | -2.085                  | .932  |
| SE <sup>b</sup> | 1.386       | 1.4408     | .962   | .391            | -2.615                  | 5.386 |

a. Random-effects meta-regression

b. Standard error of effect size

**FigureS2. Publication Bias Assessment for MACE.**

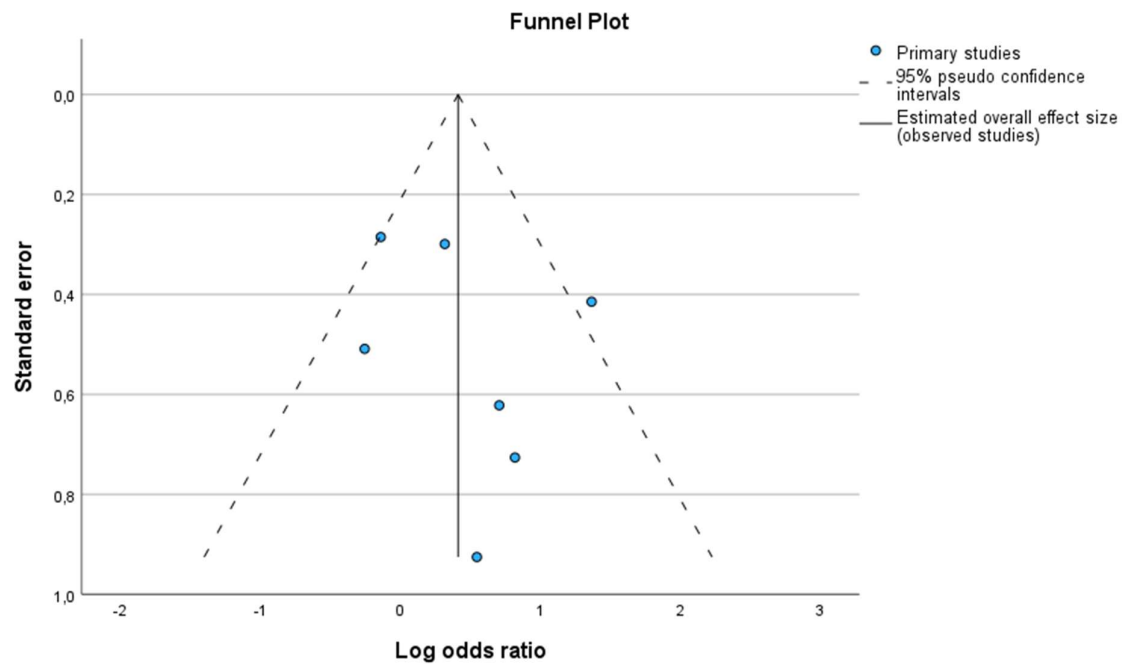

**Egger's Regression-Based Test<sup>a</sup>**

| Parameter       | Coefficient | Std. Error | t    | Sig. (2-tailed) | 95% Confidence Interval |       |
|-----------------|-------------|------------|------|-----------------|-------------------------|-------|
|                 |             |            |      |                 | Lower                   | Upper |
| (Intercept)     | ,010        | ,6701      | ,014 | ,989            | -1,713                  | 1,732 |
| SE <sup>b</sup> | ,887        | 1,3605     | ,652 | ,543            | -2,610                  | 4,384 |

a. Random-effects meta-regression

b. Standard error of effect size

**FigureS3. Publication Bias Assessment for TVR.**

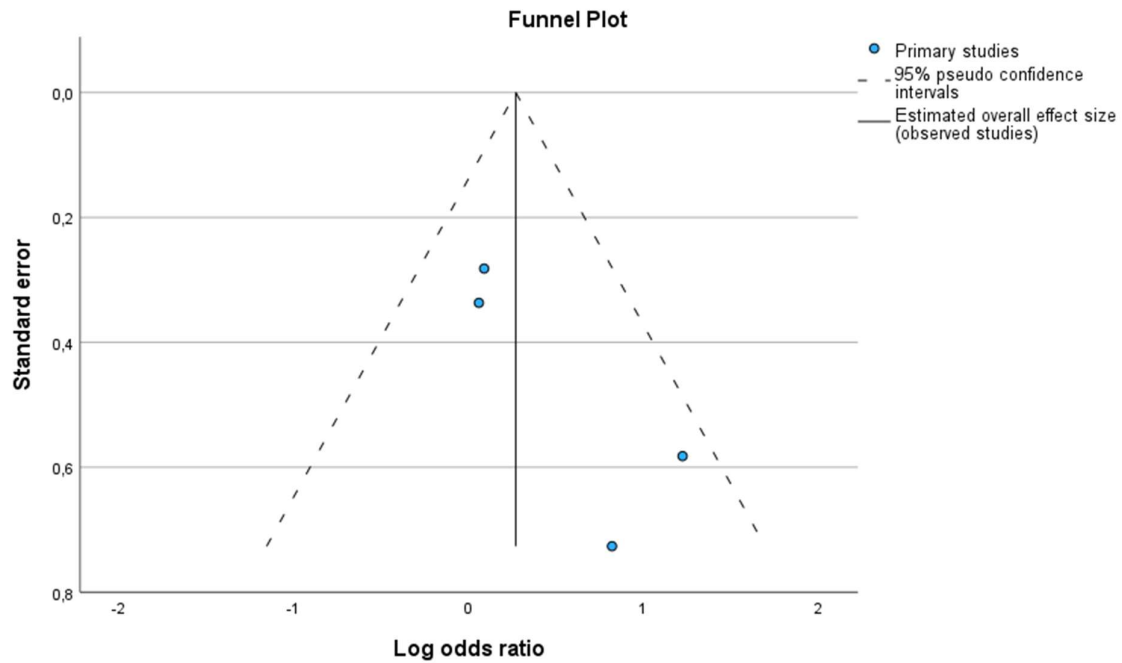

**Egger's Regression-Based Test<sup>a</sup>**

| Parameter       | Coefficient | Std. Error | t      | Sig. (2-tailed) | 95% Confidence Interval |       |
|-----------------|-------------|------------|--------|-----------------|-------------------------|-------|
|                 |             |            |        |                 | Lower                   | Upper |
| (Intercept)     | -,680       | ,5632      | -1,207 | ,351            | -3,103                  | 1,744 |
| SE <sup>b</sup> | 2,558       | 1,4427     | 1,773  | ,218            | -3,649                  | 8,765 |

a. Random-effects meta-regression

b. Standard error of effect size

**FigureS4. Publication Bias Assessment for TVF.**

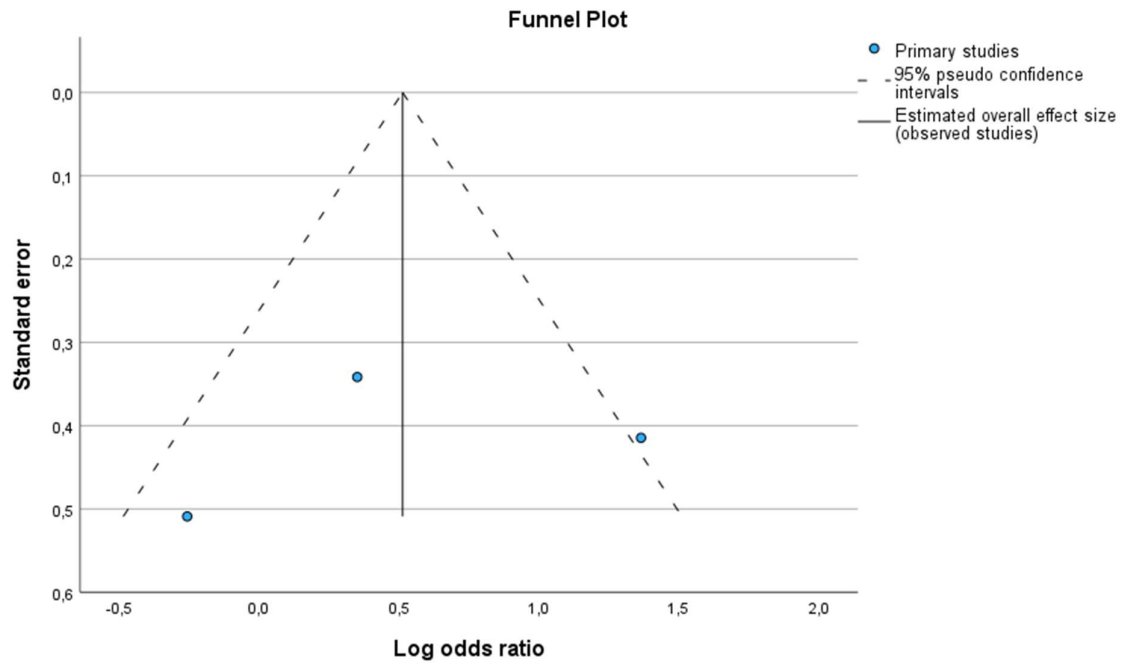

**Egger's Regression-Based Test<sup>a</sup>**

| Parameter       | Coefficient | Std. Error | t     | Sig. (2-tailed) | 95% Confidence Interval |         |
|-----------------|-------------|------------|-------|-----------------|-------------------------|---------|
|                 |             |            |       |                 | Lower                   | Upper   |
| (Intercept)     | 2,156       | 3,7531     | ,574  | ,668            | -45,532                 | 49,843  |
| SE <sup>b</sup> | -3,954      | 8,8591     | -,446 | ,733            | -116,518                | 108,611 |

a. Random-effects meta-regression

b. Standard error of effect size

**FigureS5. Publication Bias Assessment for TLR.**



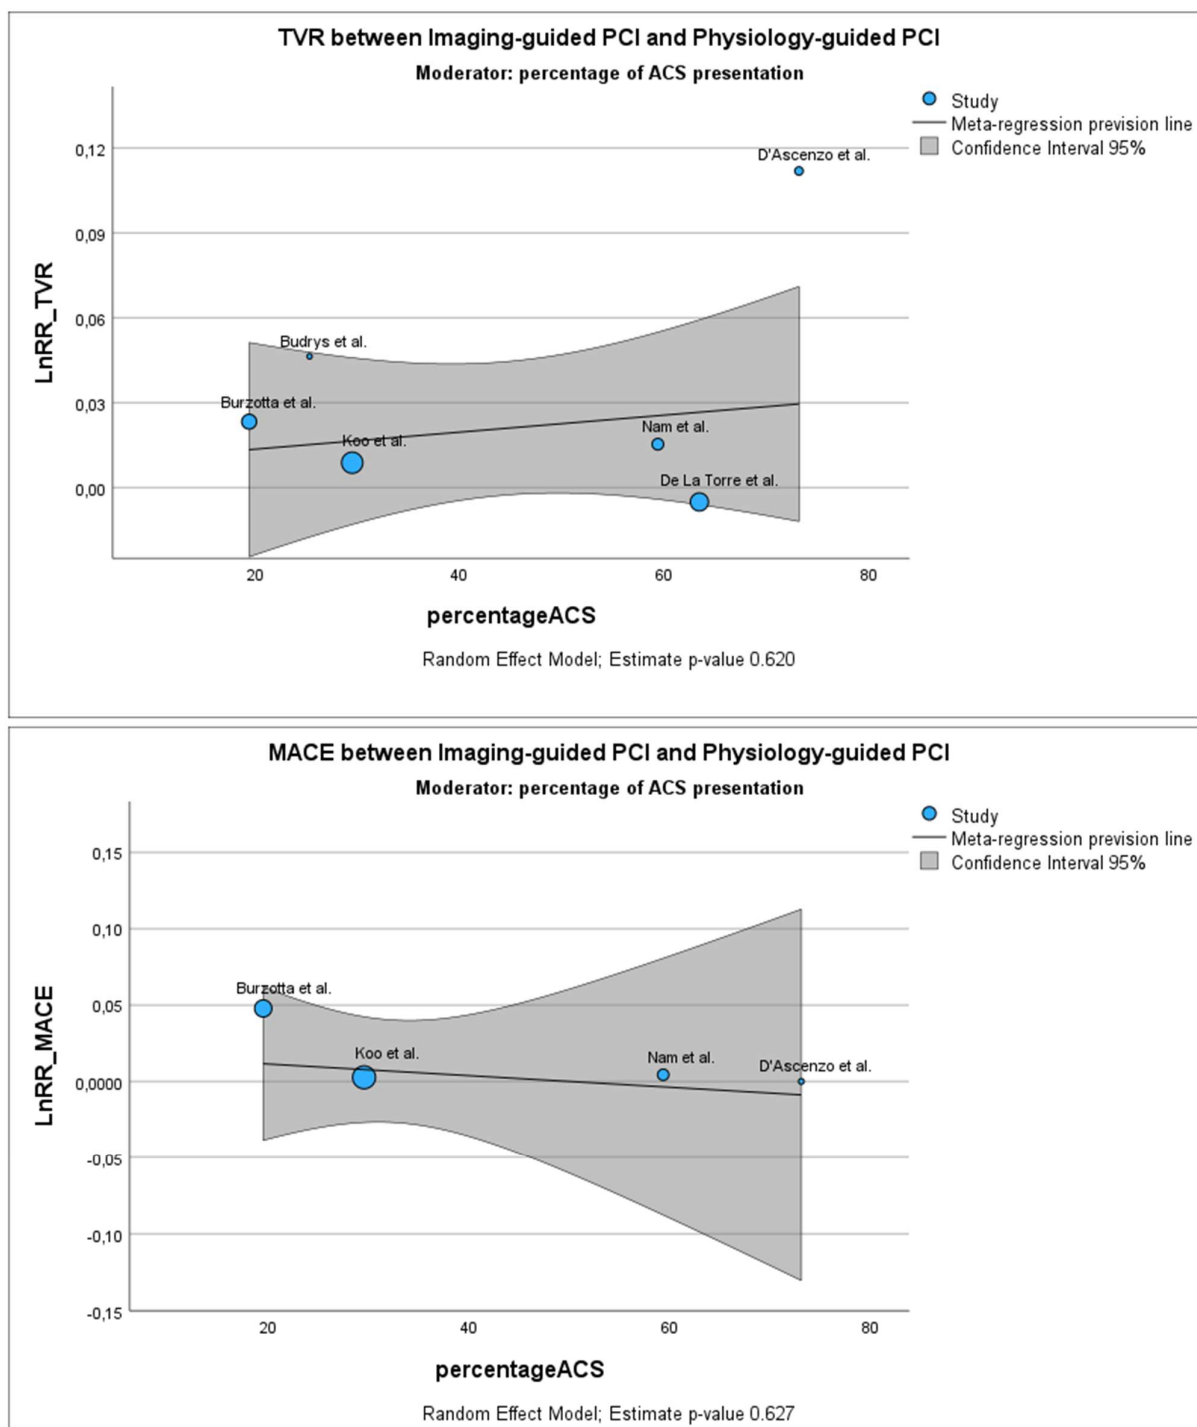

**FigureS6. Bubble plots from Meta-Regression analysis.** Upper part: Bubble plot for TVR between imaging and physiology guided PCI with ACS presentation as a moderator. Lower part: Bubble plot for MACE between imaging and physiology guided PCI with ACS presentation as a moderator. ACS, Acute coronary Syndrome; MACE, Major Adverse Cardiovascular Events; PCI, percutaneous coronary interventions; TVR, target vessel revascularization.
